# Supplementary material for: Structural diversity in charge transfer salts based on Mo3S7 and Mo3S4Se3 clusters complexes and bis(ethylenedithio)tetrathiafulvalene (ET)
Source: Royal Society of Chemistry journal article supplement (doi:10.1039/b703551a), 2007-01-01
Supplement: b703551a.pdf [file b703551a.pdf]

## Electronic Supplementary Material

# Structural Diversity in Charge Transfer Salts Based on $\text{Mo}_3\text{S}_7$ and $\text{Mo}_3\text{S}_4\text{Se}_3$ Clusters Complexes and Bis(ethylenedithio)tetrathiafulvalene (ET)

Antonio Alberola<sup>a</sup>, Rosa Llusar<sup>\* a</sup>, Sonia Triguero<sup>a</sup>, Cristian Vicent<sup>\* a</sup>, Maxim N.  
Sokolov<sup>b</sup>, and Carlos J. Gómez-García<sup>c</sup>

<sup>a</sup> *Departament de Química Física i Analítica, Universitat Jaume I, Campus de Riu Sec,  
12071, Castelló, Spain. E-mail: [llusar@qfa.uji.es](mailto:llusar@qfa.uji.es), [barrera@sg.uji.es](mailto:barrera@sg.uji.es)*

<sup>b</sup> *Institute of Inorganic Chemistry, SB RAS, pr. Lavrentyeva 3, Novosibirsk 630090, Russia*

<sup>c</sup> *Instituto de Ciencia Molecular, Universitat de Valencia, Instituto de Ciencia Molecular,  
Poligono la Coma S/N, E-46980, Paterna, Spain*

### Contents:

**Figure 1S.** ORTEP representation (50 % ellipsoids probability) of  $(\text{ET})_2[\mathbf{1}]$  salt.

**Figure 2S.** ORTEP representation (50 % ellipsoids probability) of  $(\text{ET})(\text{n-Bu}_4\text{N})[\mathbf{2}]$  salt.

**Figure 3S.** ORTEP representation (50 % ellipsoids probability) of  $(\text{ET})_2[\mathbf{3}]_2 \cdot \text{CH}_3\text{CN}$  salt.

**Figure 4S.** ORTEP representation (50 % ellipsoids probability) of  $(\text{ET})_8\{\mathbf{3}\}_2 \cdot \text{CH}_3\text{CN}$  salt.

**Figure 5S.** Raman spectra of salts  $(\text{ET})_2[\mathbf{3}]_2 \cdot \text{CH}_3\text{CN}$  (bottom) and  $(\text{ET})_8\{\mathbf{3}\}_2\text{Cl}\cdot \text{CH}_3\text{CN}$  (top).

**Figure 6S.** Experimental (top) and simulated (bottom) low temperature (80K) X-band EPR spectra of salt  
 $\text{ET}_8\{\mathbf{3}\}_2\text{Cl}\cdot \text{CH}_3\text{CN}$ .

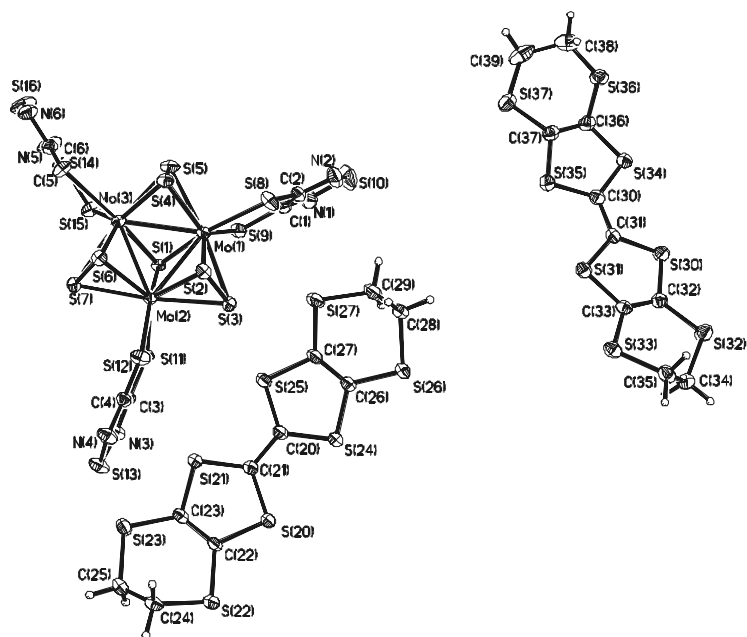

**Figure 1S.** ORTEP representation (50 % ellipsoids probability) of (ET)<sub>2</sub>[1] salt.

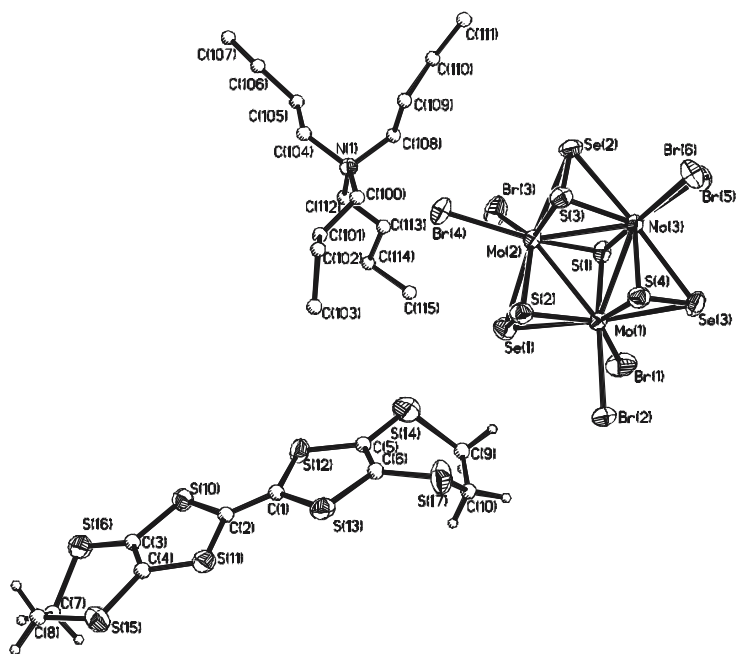

**Figure 2S.** ORTEP representation (50 % ellipsoids probability) of (ET)(n-Bu<sub>4</sub>N)[2] salt.

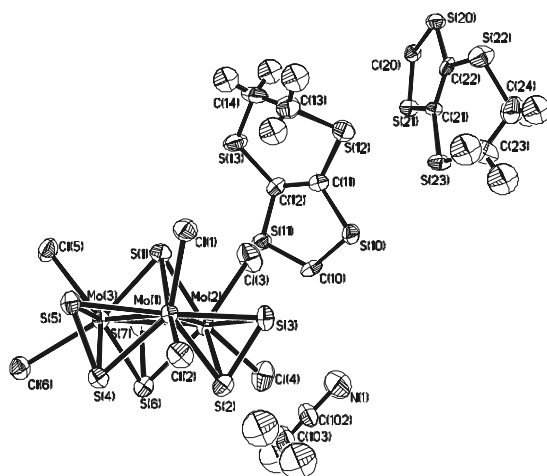

**Figure 3S.** ORTEP representation (50 % ellipsoids probability) of  $(\text{ET})_2[\mathbf{3}]_2 \cdot \text{CH}_3\text{CN}$  salt.

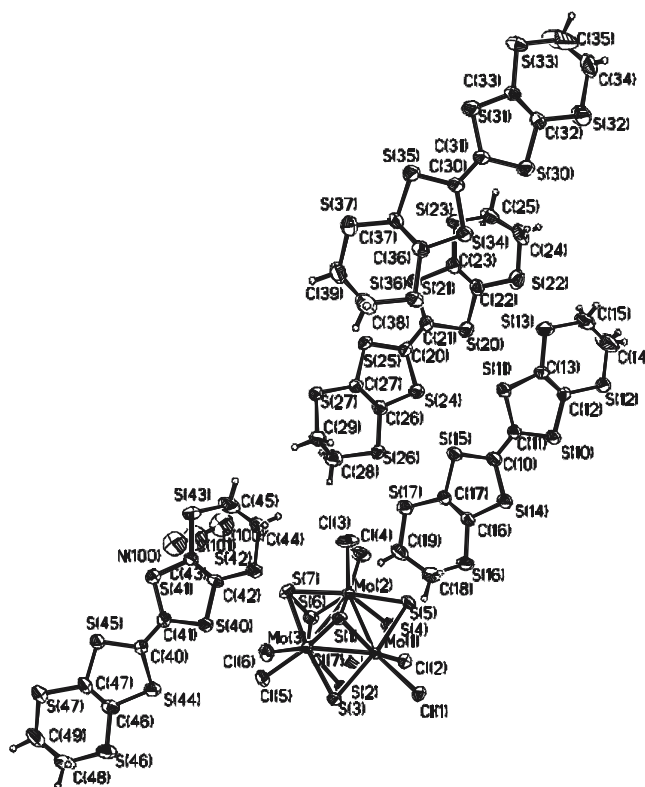

**Figure 4S.** ORTEP representation (50 % ellipsoids probability) of  $(\text{ET})_8\{\mathbf{3}\}_2 \cdot \text{CH}_3\text{CN}$  salt.

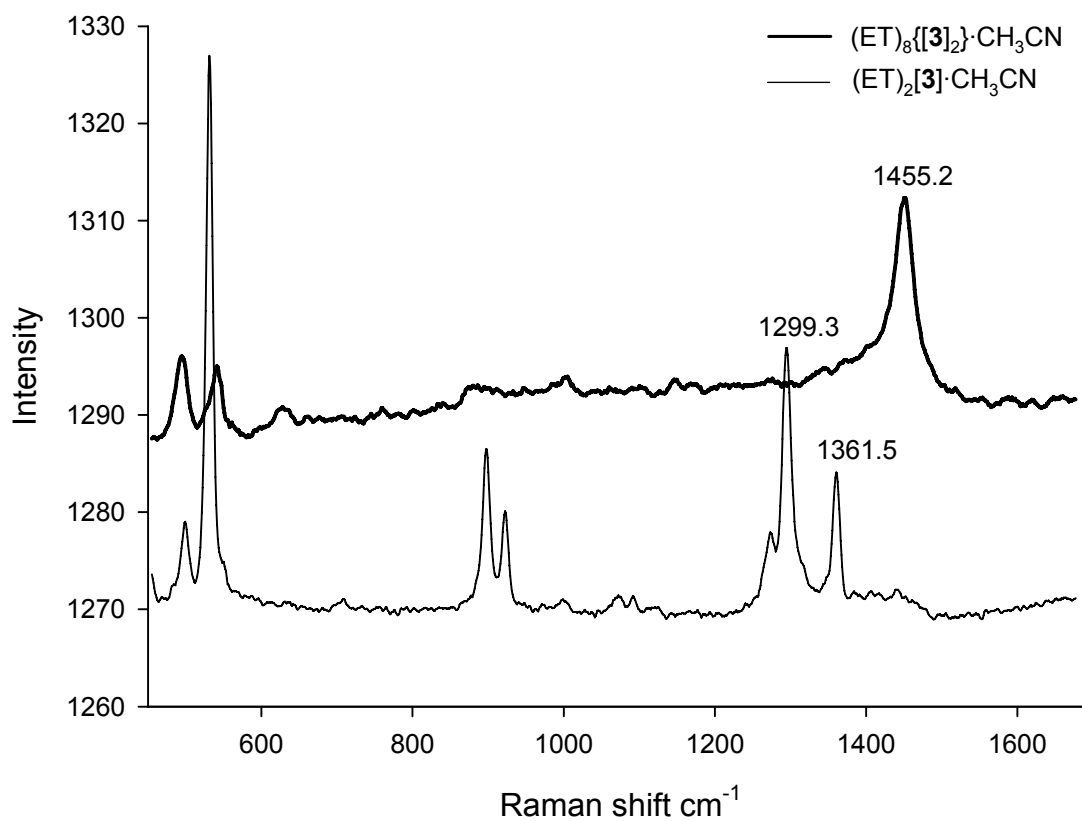

**Figure 5S.** Raman spectra of salts  $(\text{ET})_2[\mathbf{3}] \cdot \text{CH}_3\text{CN}$  (bottom) and  $(\text{ET})_8\{[\mathbf{3}]_2\} \cdot \text{CH}_3\text{CN}$  (top).

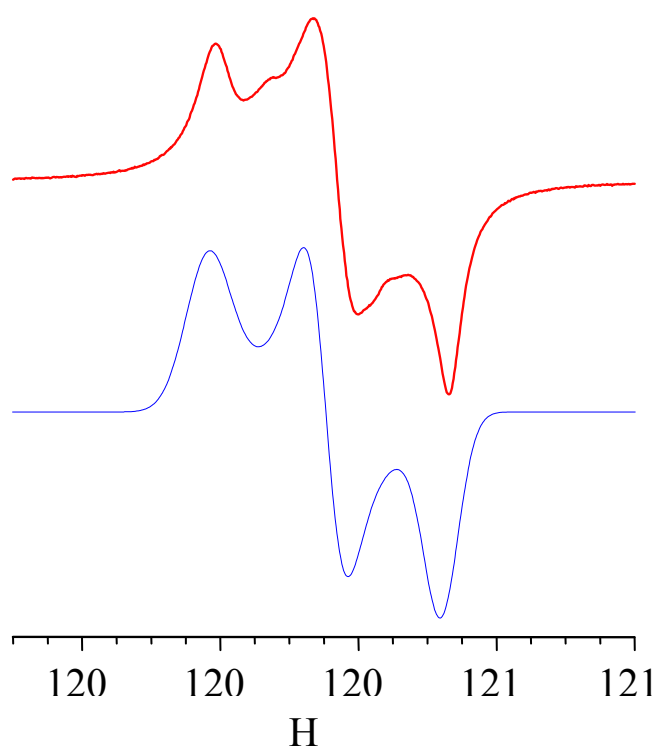

**Figure 6S.** Experimental (top) and simulated (bottom) low temperature (80K) X-band EPR spectra of salt  $\text{ET}_8\{[\mathbf{3}]_2\text{Cl}\}\cdot\text{CH}_3\text{CN}$ .
